# Supplementary material
Source: PubMed Central journal article supplement (PMC5886814)
Supplement: NIHMS949148-supplement.pdf [file NIHMS949148-supplement.pdf]

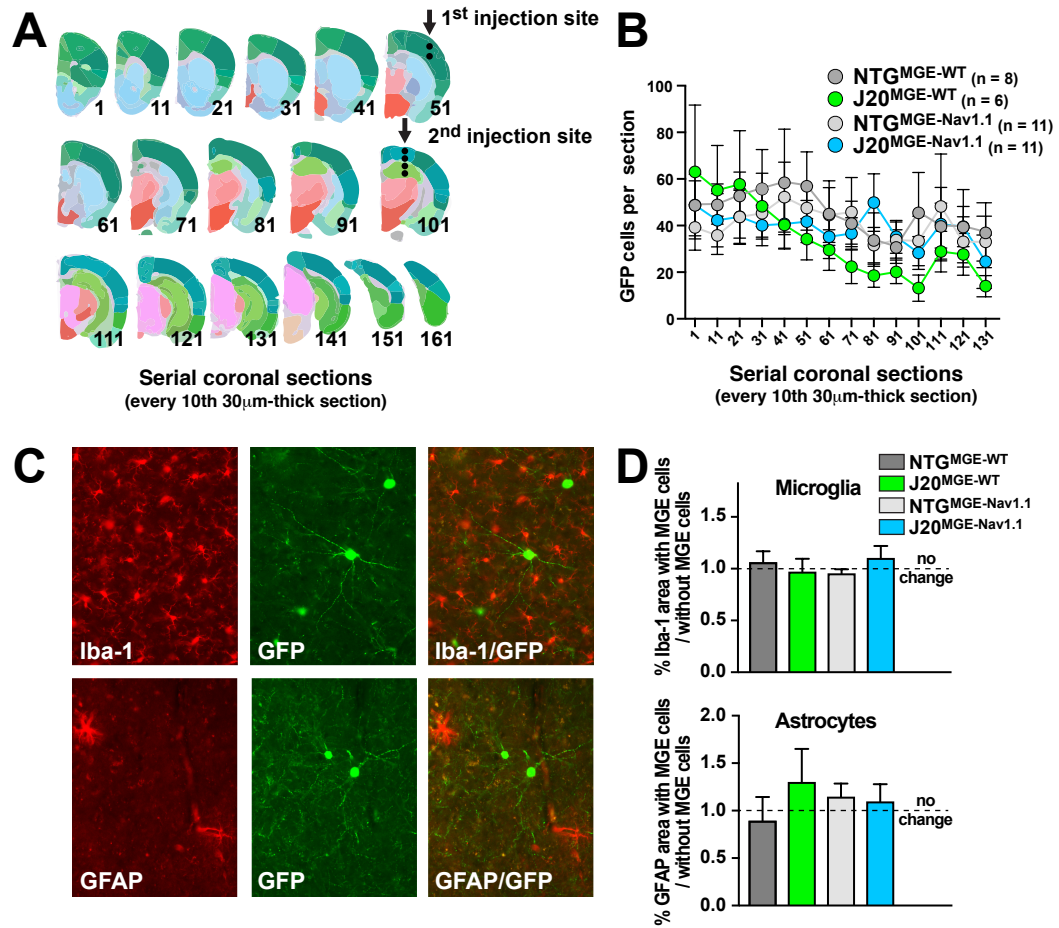

Figure S1

**Supplemental Figure S1. Related to Figure 1. MGE-Derived Cell Distribution and Glia Response.**

(A) Diagram indicating the injection sites. We transplanted cells bilaterally in the somatosensory cortex (1<sup>st</sup> injection site; two levels indicated by black dots) and in the dorsal hippocampus and the above cortical region (2<sup>nd</sup> injection site; four levels indicated by back dots). See methods for the stereotaxic coordinates.

(B) NTG and J20 mice received MGE<sup>WT</sup> or MGE<sup>Nav1.1</sup> cell transplants into the hippocampus and cortex at P3–5. After 7–8 months, GFP<sup>Lhx6</sup>-positive MGE-derived cells were counted in every 10<sup>th</sup> serial coronal 30 $\mu$ m-section throughout the rostrocaudal extent of the right forebrain. Distribution of GFP<sup>Lhx6</sup>-positive MGE-derived interneurons throughout the rostrocaudal extent of the forebrain. 21,696 MGE-derived cells were counted (n = 6–11 mice per group, 537 brain sections, and 13–18 sections per mouse). Data are means  $\pm$  SEM.

(C and D) Brain sections from 7–8-month-old NTG and J20 mice transplanted at P3–5 with MGE<sup>WT</sup> or MGE<sup>Nav1.1</sup> cells were labeled for Iba-1 (red, microglia) or GFAP (red, astrocytes) and GFP (green, MGE cells) (C). % Area occupied by microglia (top) or astrocytes (bottom) in adjacent areas with or without GFP-MGE-derived interneurons (internal control) was quantified and the ratio calculated. The presence of MGE<sup>WT</sup>- or MGE<sup>Nav1.1</sup>-derived cells did not change microglia or astrocyte levels in NTG or J20 mice (n = 3 mice per group).  $P > 0.05$  by one-way ANOVA and Bonferroni *post hoc* test. Values are mean  $\pm$  SEM.

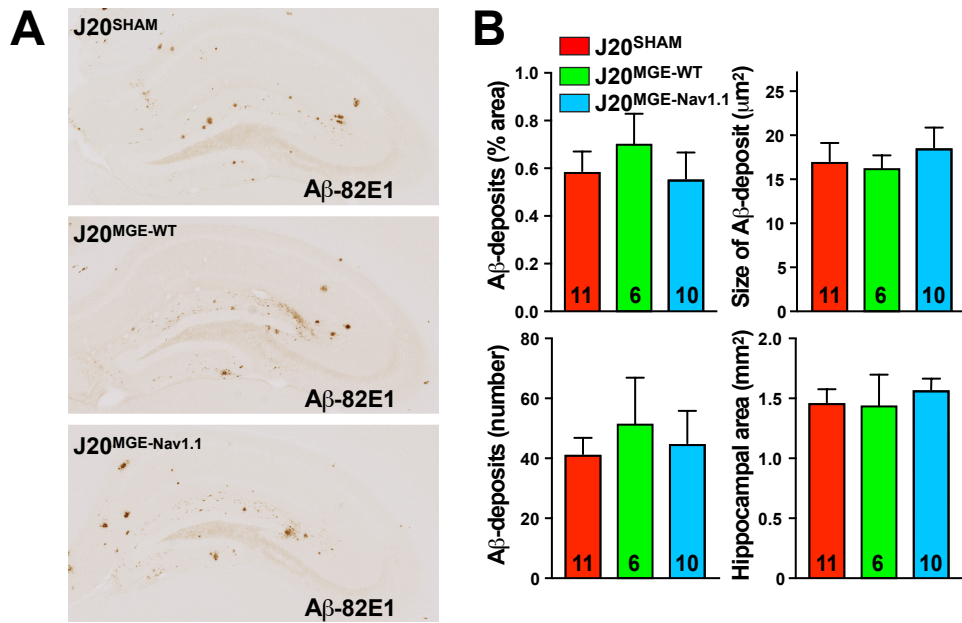

Figure S2

**Supplemental Figure S2. Related to Figure 1. MGE Cell Transplants Do Not Alter Early Hippocampal Amyloid Deposition in J20 Mice.**

(A) J20 mice were sham-treated or transplanted with MGE<sup>WT</sup> or MGE<sup>Nav1.1</sup> cells into the hippocampus and cortex at P3–5. After 7–8 months, hippocampal A $\beta$ -positive deposits were measured by immunohistochemistry analyses using the anti-A $\beta$  82E1 antibody.

(B) Compared to sham-treated mice, MGE<sup>WT</sup>- or MGE<sup>Nav1.1</sup>-derived cell transplants did not change the % area occupied by A $\beta$ -deposits, size of A $\beta$ -deposits or number of A $\beta$ -deposits in the hippocampus of J20 mice. Hippocampal area was also not altered by MGE transplants.  $P > 0.05$  by one-way ANOVA and Bonferroni *post hoc* test. Values are mean  $\pm$  SEM. Numbers in bars indicate numbers of mice.

**A**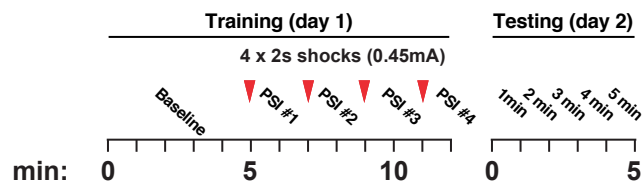**B**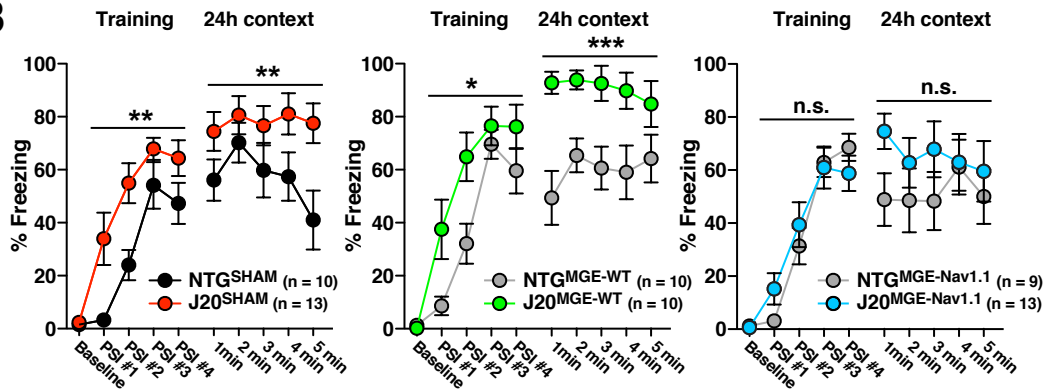**C**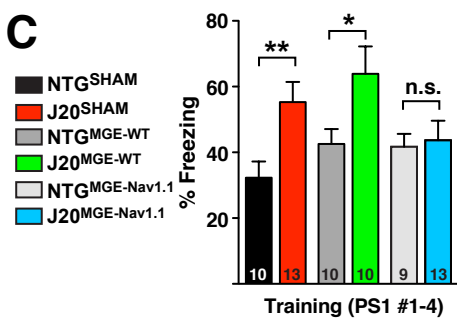**D**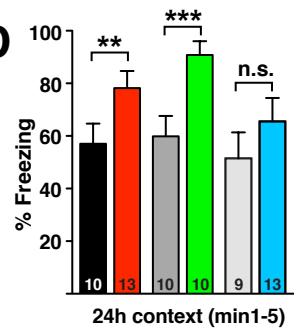**Figure S3**

**Supplemental Figure S3. Related to Figure 2. MGE<sup>Nav1.1</sup> Cell Transplants Prevent Excessive Freezing in J20 Mice.** Mice were sham treated or received MGE<sup>WT</sup> or MGE<sup>Nav1.1</sup> cell transplants bilaterally into the hippocampus and cortex at P3–5. Mice were tested in a fear-conditioning test at 4–7 months of age.

(A) Training and testing protocols.

(B) Change in freezing behavior ( $n = 9–13$  mice per group).

(C) MGE<sup>Nav1.1</sup>, but not MGE<sup>WT</sup>, cell transplants prevented excessive freezing in J20 mice during training. PSI, post-shock interval.

(D) Average freezing in the 5-min 24-h context test. Values are mean  $\pm$  SEM. \* $P < 0.05$ , \*\* $P < 0.01$ , \*\*\* $P < 0.001$  by repeated-measures ANOVA and Bonferroni *post hoc* test. n.s., not significant. (B) or one-way ANOVA and Bonferroni *post hoc* test (C and D).

Values are means  $\pm$  SEM.

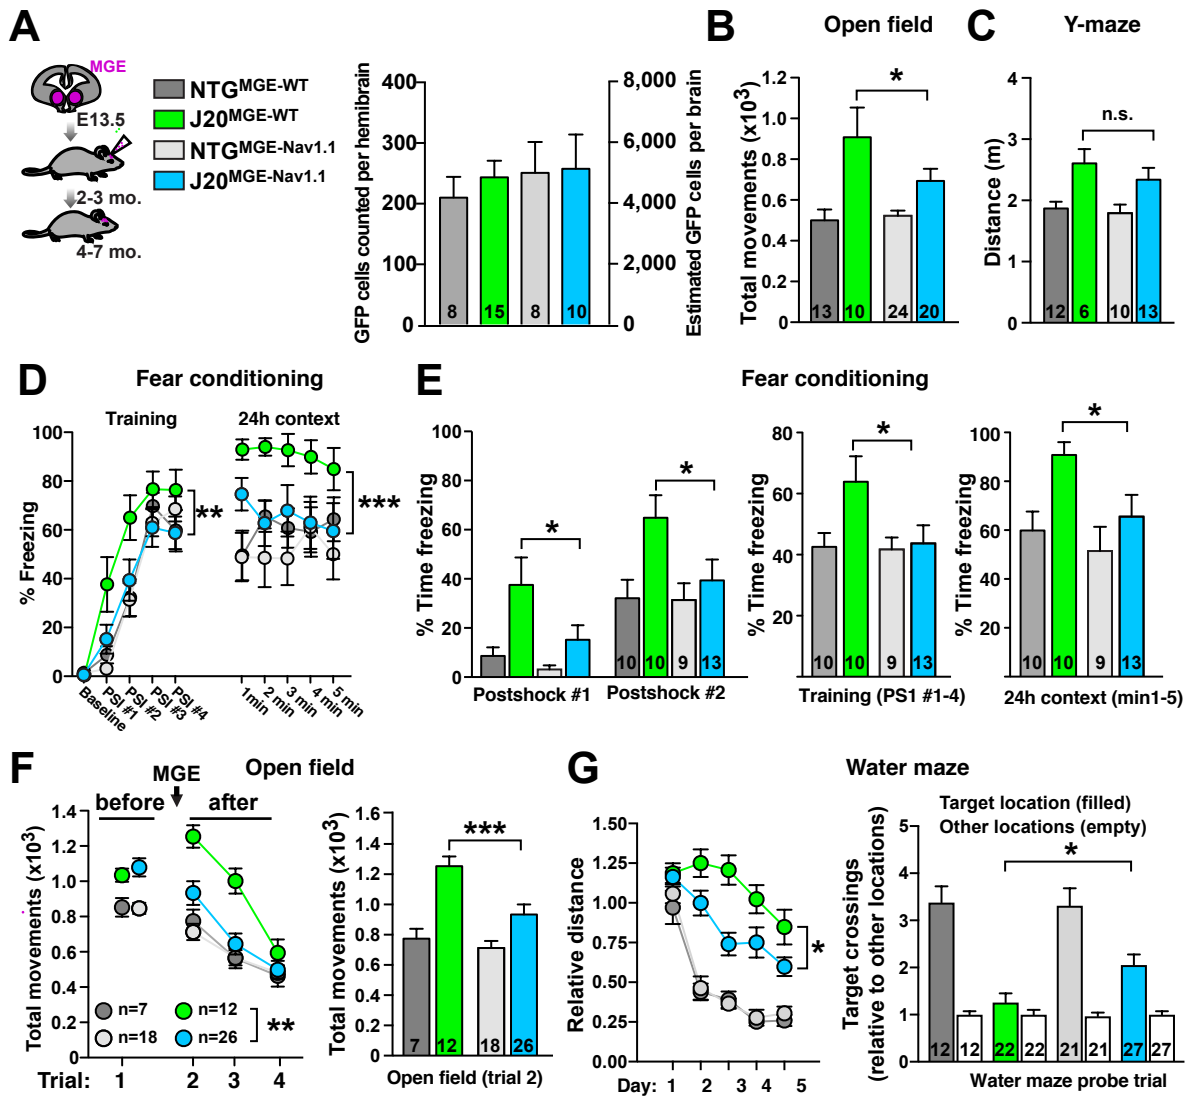

Figure S4

**Supplemental Figure S4. Related to Figure 2. Nav1.1 Expression in MGE cells is Required to Reduce Behavioral and Cognitive Abnormalities in J20 Mice.** Direct statistical comparisons between J20<sup>MGE-WT</sup> and J20<sup>MGE-Nav1.1</sup> mice by one-way ANOVA and Bonferroni *post hoc* test (B, C, E, F right, and G right) or by repeated-measures one-way ANOVA and Bonferroni *post hoc* test (D, F left, G left) for the behavioral tests described in Figure 2.

**(A)** J20 and NTG mice received MGE<sup>WT</sup> or MGE<sup>Nav1.1</sup> cell transplants bilaterally into the hippocampus and cortex at 2–3 months of age. Number of GFP-positive cells per hemibrain (*left*) and estimated number of GFP-positive cells per brain (*right*). Cells were counted in every 10th serial section in one hemibrain per mouse at 7–8 months of age ( $n = 8–15$  mice per group). Values are mean  $\pm$  SEM. Numbers in bars are the numbers of mice.

**(B–E)** J20 and NTG mice received MGE<sup>WT</sup> or MGE<sup>Nav1.1</sup> cell transplants bilaterally into the hippocampus and cortex at P3–5. Mice were tested in the open field (**B**), Y-maze (**C**), and fear-conditioning tests (**D** and **E**) at 4–7 months of age.

**(F–G)** J20 and NTG mice received MGE<sup>WT</sup> or MGE<sup>Nav1.1</sup> cell transplants into the hippocampus and cortex at 2–3 months of age. Mice were tested in the open field (**F**) and Morris water maze tests (**G**) at 4–7 months of age.

Values are mean  $\pm$  SEM. Numbers in bars indicate numbers of mice.



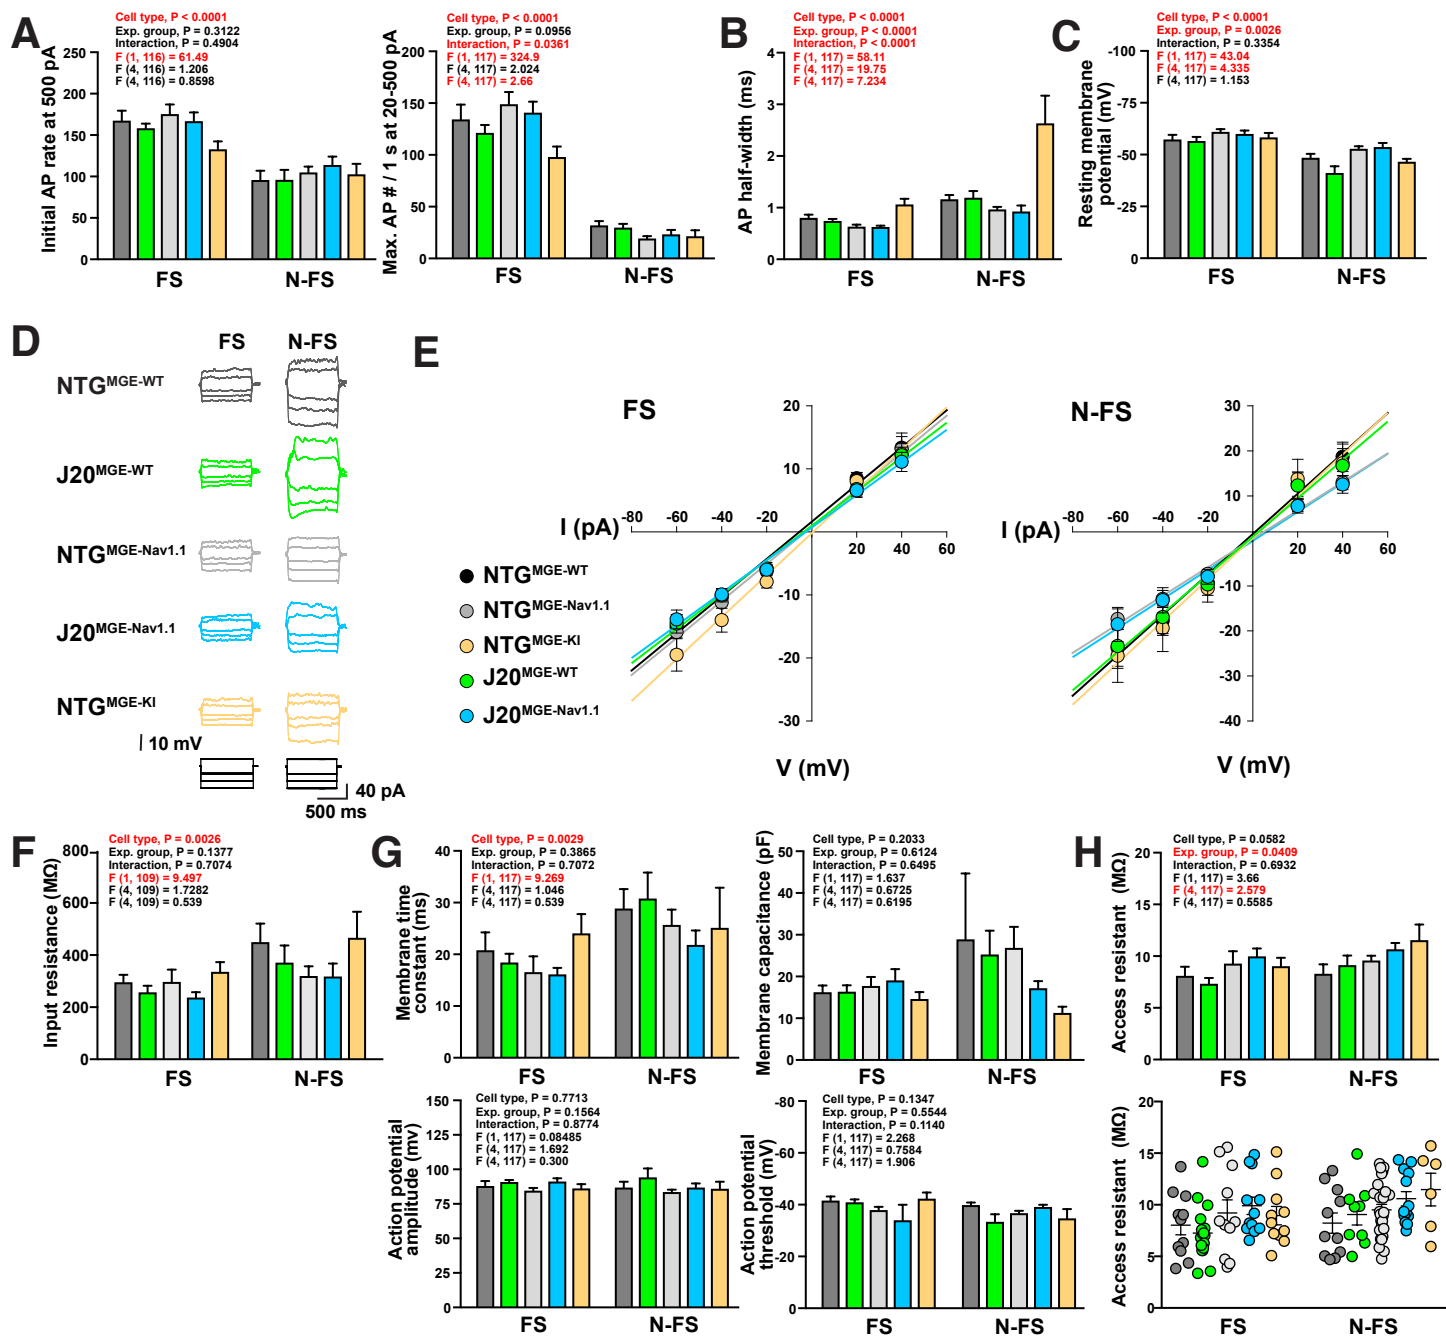

Figure S5

**Supplemental Figure S5. Related to Figures 4 and 5. Electrophysiological Properties of Transplanted MGE<sup>WT</sup>, MGE<sup>Nav1.1</sup> or MGE<sup>Nav1.1-KI</sup>-Derived Fast-Spiking (FS) and Non-Fast-Spiking (N-FS) Interneurons in NTG and J20 Mice.**

Mice received MGE<sup>WT</sup>, MGE<sup>Nav1.1</sup> or MGE<sup>Nav1.1-KI</sup> cell transplants into the hippocampus and cortex at P3–5. Whole-cell patch-clamp recordings from acute coronal brain slices were performed at 6–11 months of age. FS:  $n = 11, 17, 11, 12,$  and 11 cells from 5 NTG<sup>MGE-WT</sup>, 7 J20<sup>MGE-WT</sup>, 4 NTG<sup>MGE-Nav1.1</sup>, 4 J20<sup>MGE-Nav1.1</sup>, and 3 NTG<sup>MGE-Nav1.1-KI</sup> mice, respectively. N-FS:  $n = 11, 9, 26, 13,$  and 6 cells from 4 NTG<sup>MGE-WT</sup>, 6 J20<sup>MGE-WT</sup>, 8 NTG<sup>MGE-Nav1.1</sup>, 4 J20<sup>MGE-Nav1.1</sup>, and 3 NTG<sup>MGE-Nav1.1-KI</sup> mice, respectively.

**(A–C)** The intrinsic properties used to classify the FS and N-FS interneurons included the initial firing rate of APs at 500 pA (**A**, left) and the maximum number of APs that fired in response to a 1-s current injection at any current intensity (20–500 pA) (**A**, right), the AP half-width (**B**) and the resting membrane potential (**C**).

**(D–F)** In current clamp mode, the membrane potential was maintained at -60 mV and 1-s current injections were applied to generate the current-voltage relationship of the MGE-derived FS and N-FS interneurons. **(D)** Representative traces of the membrane potential shifts elicited by incremental current injections in the FS and N-FS interneurons. **(E, F)** The slope of the current-voltage relationship in MGE-derived FS and N-FS interneurons was calculated to determine their input resistance.

**(G)** Quantification of the mean membrane time constant, membrane capacitance, AP amplitude and AP threshold.

**(H)** Bar (*top*) and scatter (*bottom*) graphs of the access resistance for all recorded MGE-derived interneurons. Access resistance was  $<16\text{M}\Omega$  for all recorded cells.

Values are mean  $\pm$  SEM.  $P$  values by two-way ANOVA assessing cell type, experimental group, and interaction. Significant  $P$  values are indicated in red.

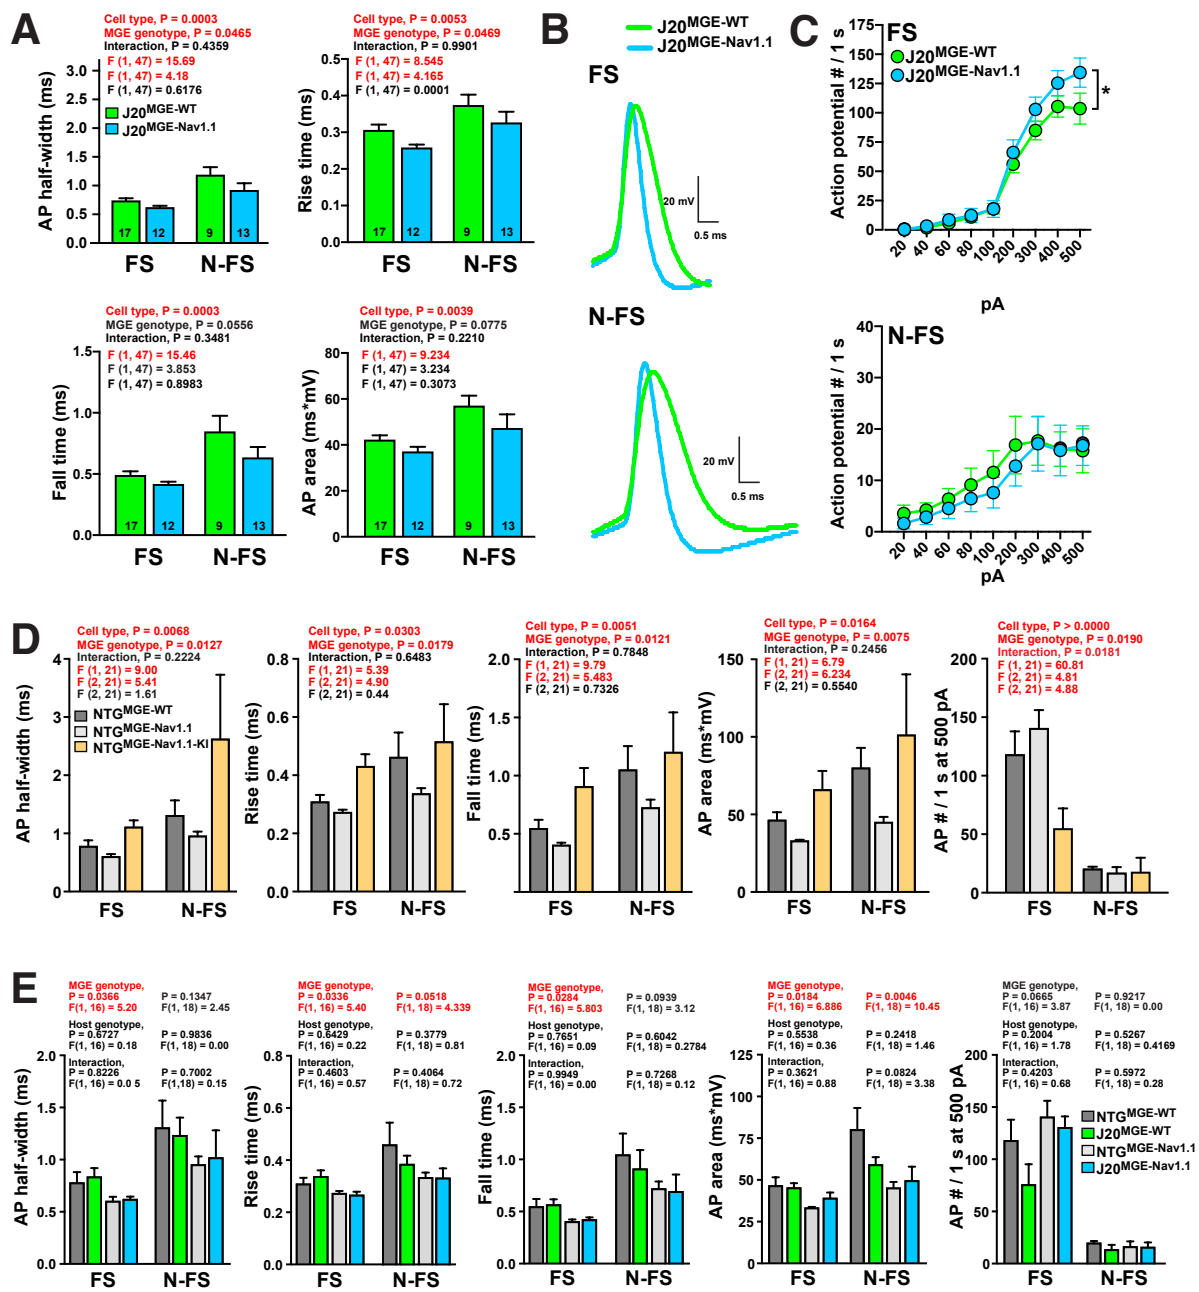

Figure S6

**Supplemental Figure S6. Related to Figures 4 and 5. Transplanted MGE<sup>Nav1.1</sup>-Derived Interneurons Exhibit Faster AP Kinetics and Increased AP Firing Rates in J20 Mice.** Mice received MGE<sup>WT</sup>, MGE<sup>Nav1.1</sup> or MGE<sup>Nav1.1-KI</sup> cell transplants into the hippocampus and cortex at P3–5. Whole-cell patch-clamp recordings from acute coronal brain slices were performed at 6–11 months of age. FS:  $n = 11, 17, 11, 12,$  and 11 cells from 5 NTG<sup>MGE-WT</sup>, 7 J20<sup>MGE-WT</sup>, 4 NTG<sup>MGE-Nav1.1</sup>, 4 J20<sup>MGE-Nav1.1</sup>, and 3 NTG<sup>MGE-Nav1.1-KI</sup> mice, respectively. N-FS:  $n = 11, 9, 26, 13,$  and 6 cells from 4 NTG<sup>MGE-WT</sup>, 6 J20<sup>MGE-WT</sup>, 8 NTG<sup>MGE-Nav1.1</sup>, 4 J20<sup>MGE-Nav1.1</sup>, and 3 NTG<sup>MGE-Nav1.1-KI</sup> mice, respectively.

**(A–C)** Direct statistical comparisons between transplanted MGE<sup>WT</sup>- and MGE<sup>Nav1.1</sup>-derived FS and N-FS interneurons in J20 mice for the cells described in Figure 5. J20 mice received MGE<sup>WT</sup> or MGE<sup>Nav1.1</sup> cell transplants into the hippocampus and cortex at P3–5. Whole-cell patch-clamp recordings from interneurons in the cortex of acute coronal brain slices were done at 6–11 months of age. **(A)** Quantification of AP waveform properties of MGE<sup>WT</sup>- and MGE<sup>Nav1.1</sup>-derived FS and N-FS interneurons in J20 mice. Numbers in bars indicate numbers of cells.  $P$  values by two-way ANOVA assessing MGE genotype (WT and Nav1.1), host brain genotype (NTG and J20), and interaction.  $P$  values by two-way ANOVA assessing MGE genotype (WT and Nav1.1), host brain genotype (NTG and J20), and interaction. Significant  $P$  values are in red. **(B)** Representative traces of AP waveforms recorded from MGE<sup>WT</sup>- and MGE<sup>Nav1.1</sup>-derived FS and N-FS interneurons in J20 mice. **(C)** Mean number of APs evoked by the indicated incremental current intensities in MGE<sup>WT</sup>- and MGE<sup>Nav1.1</sup>-derived FS (*top*) and N-FS (*bottom*) interneurons transplanted into J20 mice.  $*P < 0.05$  by repeated-measures ANOVA and Bonferroni test for 200–500 pA.

(D) Quantification of AP waveform properties of transplanted MGE<sup>WT</sup>-, MGE<sup>Nav1.1</sup>-, and MGE<sup>Nav1.1-KI</sup>-derived FS and N-FS interneurons in NTG mice from Figure 4 analyzed using mice as the biological unit to calculate averages. FS:  $n = 5$  NTG<sup>MGE-WT</sup>, 4 NTG<sup>MGE-Nav1.1</sup>, and 3 NTG<sup>MGE-Nav1.1-KI</sup> mice with 11, 11, and 11 cells analyzed, respectively. N-FS:  $n = 4$  NTG<sup>MGE-WT</sup>, 8 NTG<sup>MGE-Nav1.1</sup>, and 3 NTG<sup>MGE-Nav1.1-KI</sup> mice with 11, 26, and 6 cells analyzed, respectively. *P* values by two-way ANOVA assessing cell type (FS and N-FS), MGE genotype (WT, Nav1.1, and Nav1.1-KI), and interaction. Significant *P* values are indicated in red.

(E) Quantification of AP waveform properties of MGE<sup>WT</sup>- and MGE<sup>Nav1.1</sup>-derived FS and N-FS interneurons in NTG and J20 mice from Figure 5 analyzed using mice as the biological unit to calculate averages. FS:  $n = 5$  NTG<sup>MGE-WT</sup>, 7 J20<sup>MGE-WT</sup>, 4 NTG<sup>MGE-Nav1.1</sup>, and 4 J20<sup>MGE-Nav1.1</sup> with 11, 17, 11, and 12 cells analyzed, respectively. N-FS:  $n = 4$  NTG<sup>MGE-WT</sup>, 6 J20<sup>MGE-WT</sup>, 8 NTG<sup>MGE-Nav1.1</sup>, and 4 J20<sup>MGE-Nav1.1</sup> mice with 11, 9, 26, and 13 cells analyzed, respectively. *P* values by two-way ANOVA assessing MGE genotype (WT and Nav1.1), host brain genotype (NTG and J20), and interaction.

Values are mean  $\pm$  SEM.

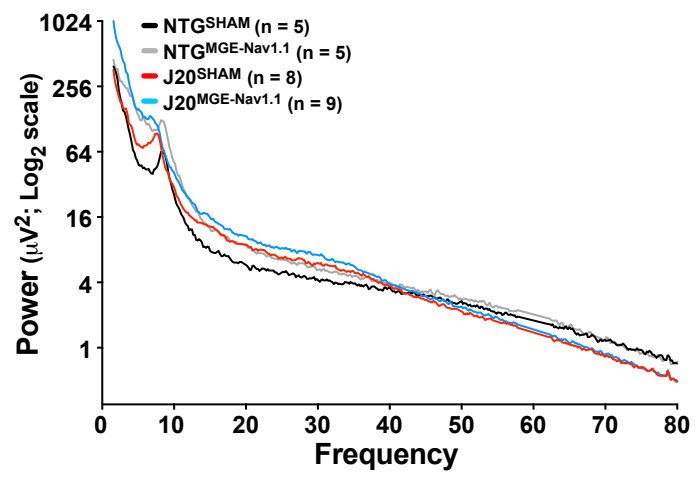

**Figure S7**

**Supplemental Figure S7. Related to Figure 7. Power Spectrum Analysis of NTG and J20 Mice Sham-Treated or Transplanted with MGE<sup>Nav1.1</sup> Cells.** Mice were sham-treated or transplanted bilaterally with MGE<sup>Nav1.1</sup> cells at 2–3 months of age. EEGs were recorded at 7–8 months during the first 10 min of novel environment exploration (See Figure 6A). Please note that these data represent raw power values without normalization to resting locomotor activity and experimental groups may differ in locomotor activity. Power spectrum data was extracted using Spike2 software version 8 with FFT size 1024 (resolution 0.1953) and Hanning window function.
